# Supplementary material for: Influence of Two Hexose Transporters on Substrate Affinity and Pathogenicity in Magnaporthe oryzae
Source: MDPI journal article supplement (doi:10.3390/microorganisms12040681), 2024-03-28
Supplement: s1 [file s1]

## Supplementary

### Supporting Information Legends

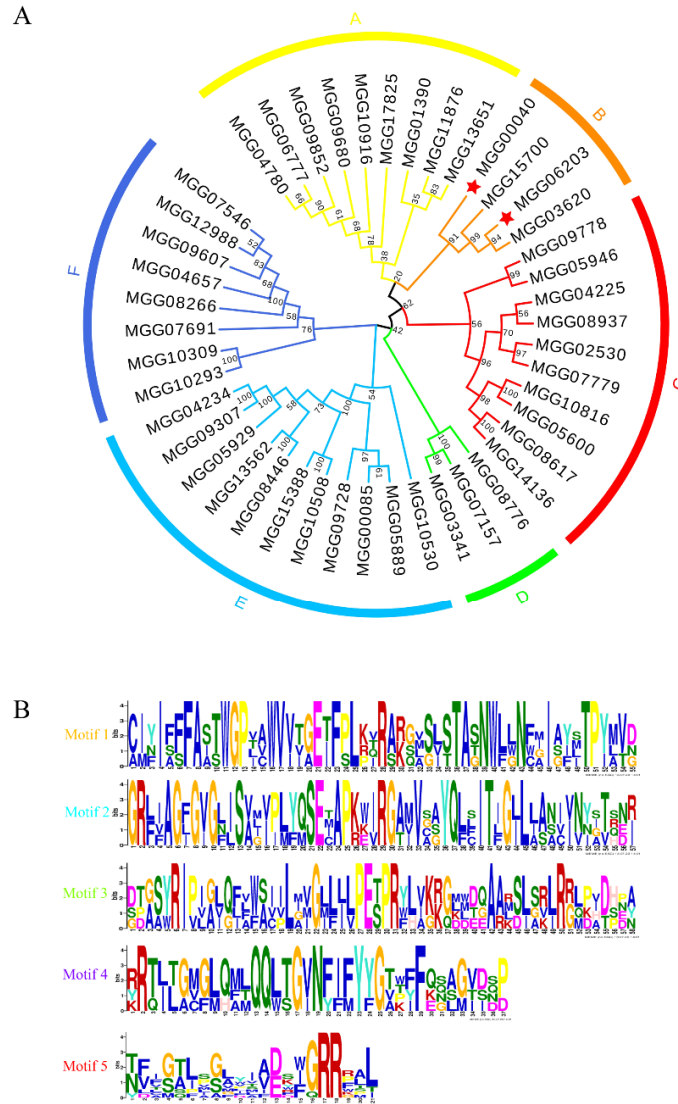

**Figure S1.** Phylogenetic tree and domain prediction analyses of the *MoHXTs* and their homologs from *Magnorporthe oryzae*. (A) The phylogenetic tree was constructed by MEGA7's Neighbor-Joining (NJ) method, and 1000 replications were performed for bootstrap values. The six clusters of proteins are distinguished by different colors. (B) Domain architectural analysis of Class b. The conserved motifs of *MoHXT* proteins along with a scale used to estimate the length of the proteins were drawn using TBtools software. Motif 1–6 were indicated. Y-axis values show the best possible matching E-Value.

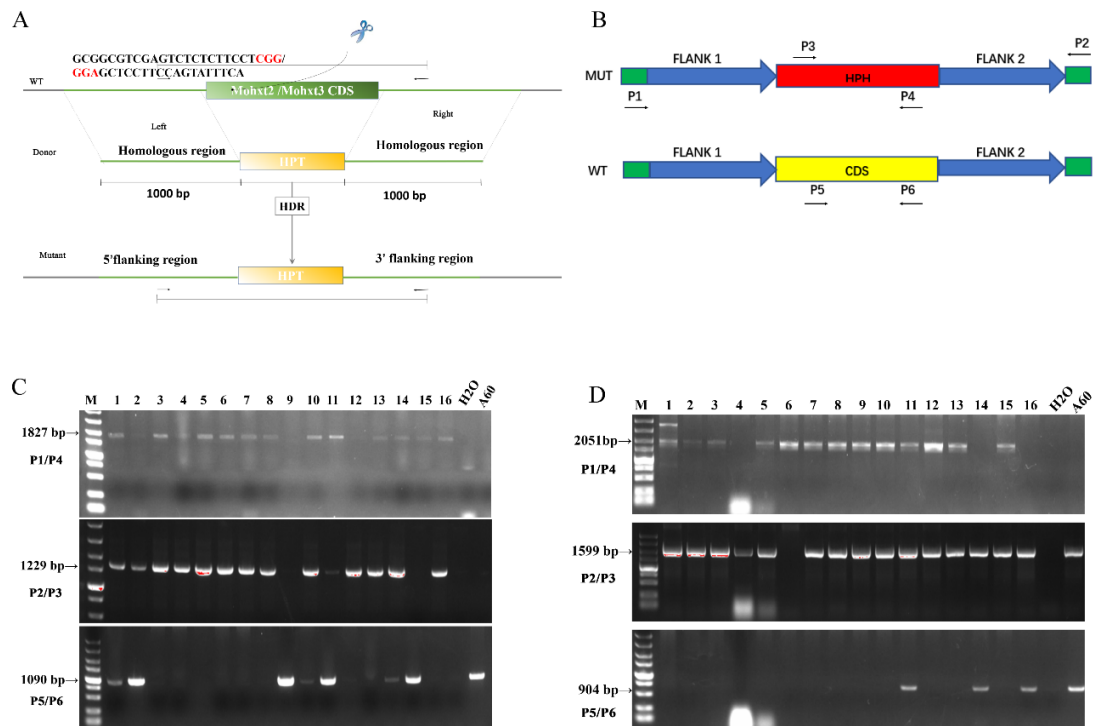

**Figure S2.** Schematic overview of the targeted gene replacement strategy and PCR diagnostic gel electrophoresis. (A) Illustration of the genomic target sequence for *MoHXT2* targeting the RNP-CRISPR-Cas9 complex, showing a typical double-stranded break next to the protospacer-adjacent motif (PAM) site. (B) Positions of primer used for verification of the mutants. Two homologous arms and the hygromycin region were verified by the primer pairs P1+P4 and P3+P2, and the coding region (CDS) was checked by using the primer pair P5+P6 (primers are listed in Table S4). (C) PCR diagnostic gel for  $\Delta$ *Mohxt2*. (D) PCR diagnostic gel for  $\Delta$ *Mohxt3*.

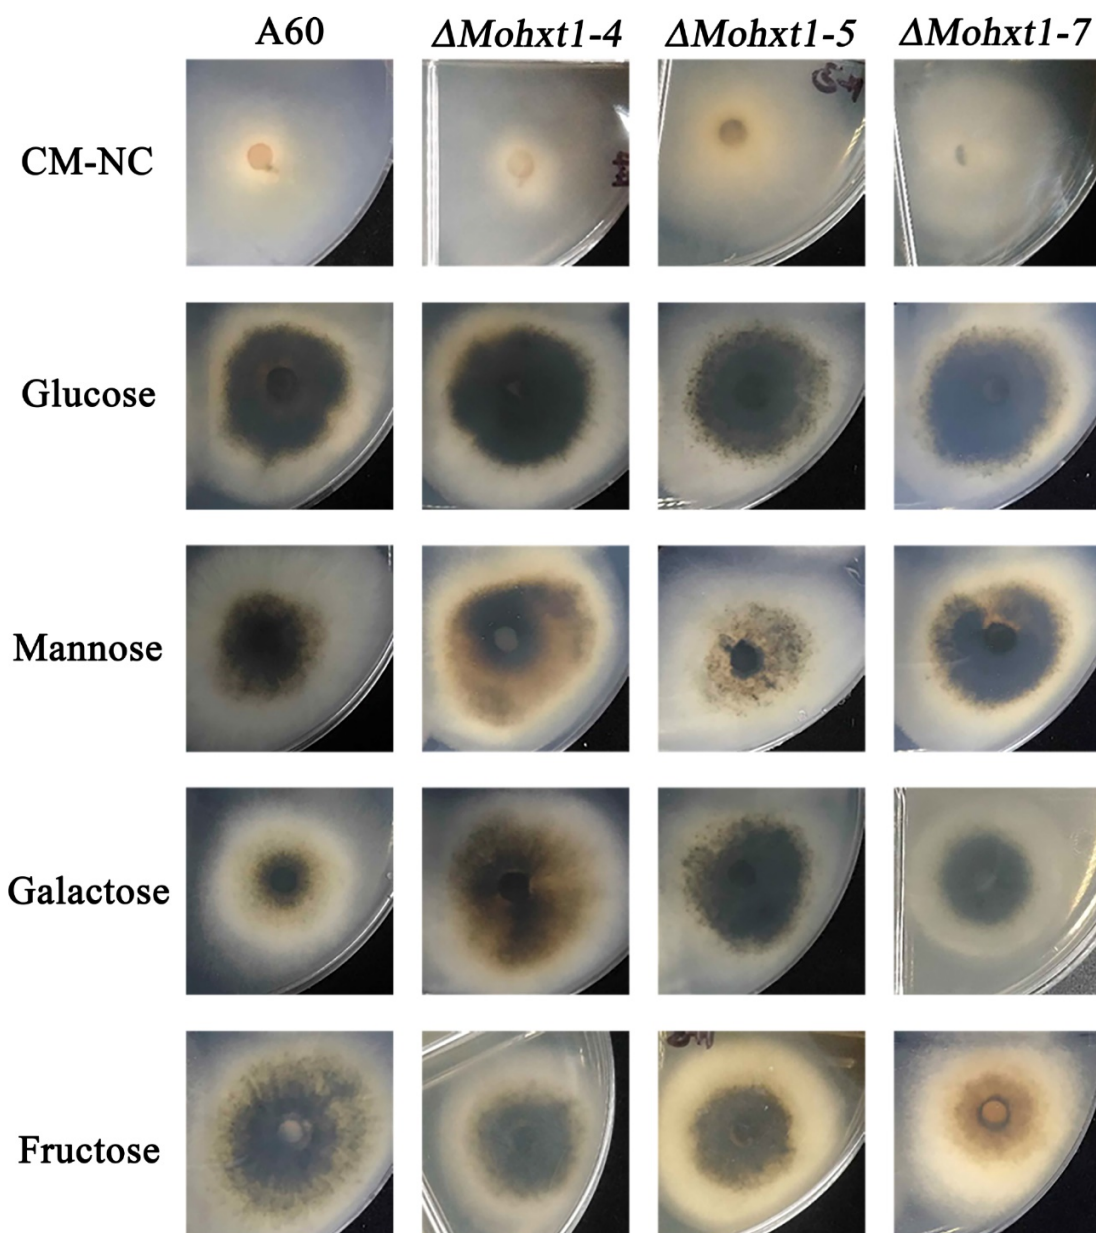

**Figure S3.** Growth of the restored functionality strains with the gene of *MoHXT2* and *MoHXT3*. Strains were cultivated on CM media supplemented with various carbon sources, including glucose, mannose, or fructose. And a parallel control lacking any carbon source (CM-NC) was included.

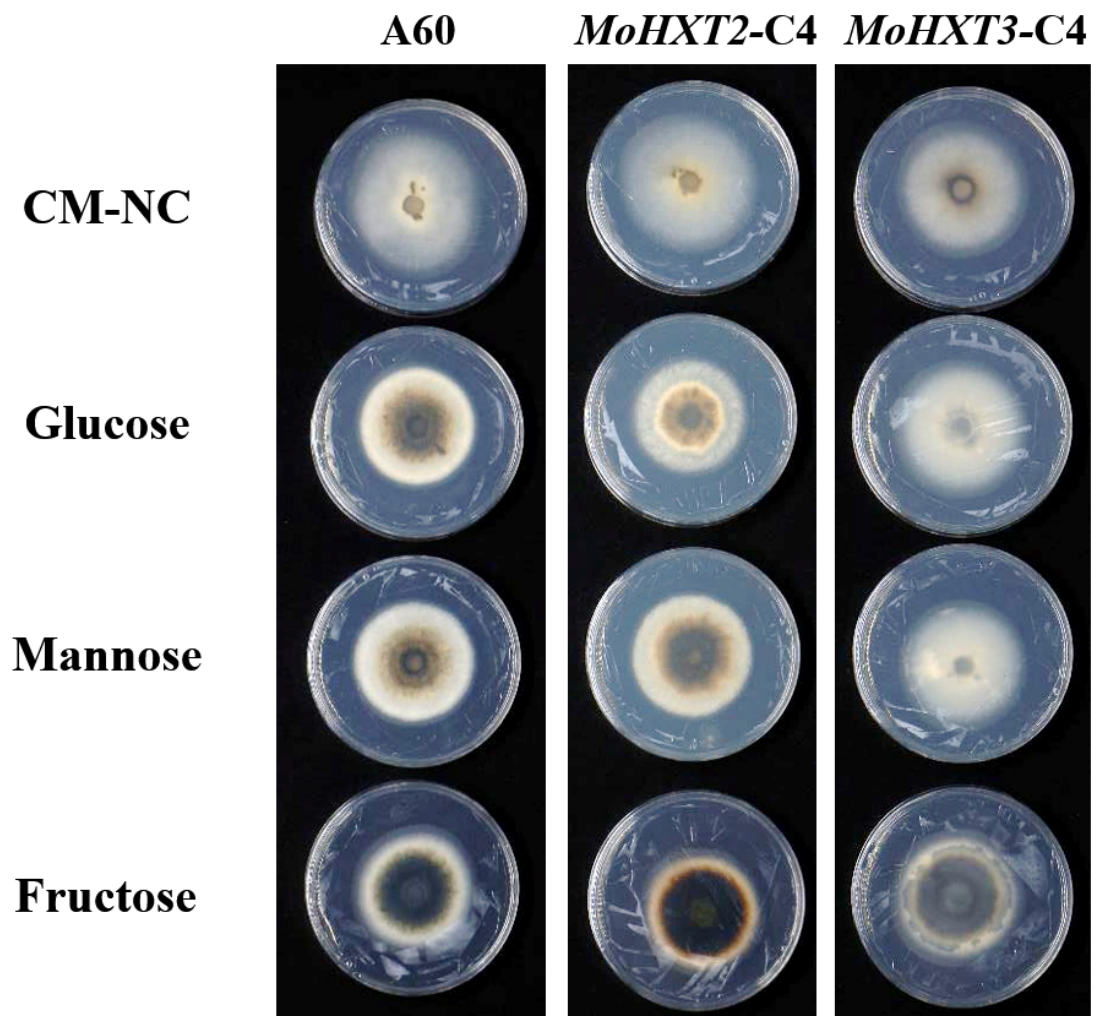

**Figure S4.** Melanin production of A60 and the  $\Delta Mohxt1$  mutant on CM medium supplemented with different carbon sources (glucose, mannose, galactose and fructose). A medium without any carbon source was used as the control (CM-CN).





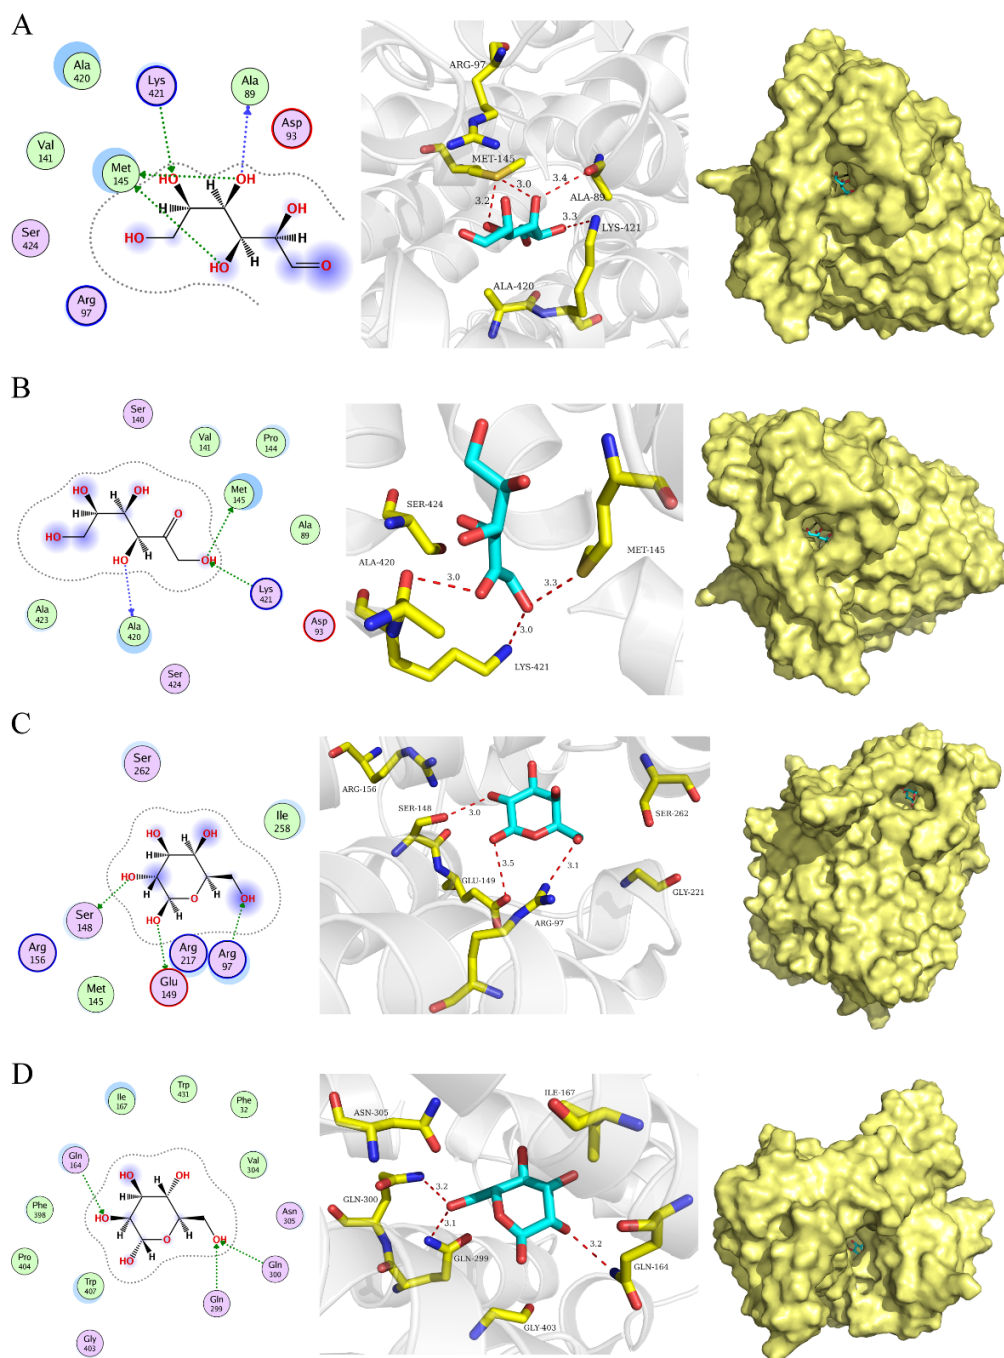

**Figure S6.** 3D binding model between *MoHXT2* and each hexose. (A) D-(+)-Glucose-50-99-7, (B) D-(-)-Fructose-57-48-7, (C) D-Galactose-59-23-4, and (D) D-Mannose-3458-28-4 are colored cyan. The surrounding residues in the binding pockets are colored yellow. The backbone of the receptor is shown in pale-yellow. The hydrogen bond is depicted as a red dashed line.

## Supplementary Tables

**Table S1. The structure of 4 monosaccharides**

| Monosaccharide         | Structure                                                                            |
|------------------------|--------------------------------------------------------------------------------------|
| D (+)-Glucose-50-99-7  | 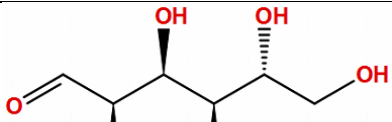   |
| D (-)-Fructose-57-48-7 |    |
| D-Galactose-59-23-4    |    |
| D-Mannose-3458-28-4    |   |
| Phlorizin dihydrate    |  |

**Table S2. The fpkm value of MoHXTs in A60,  $\Delta Mohxt2$  and  $\Delta Mohxt3$  strains**

| id        | A60_fpkm | MoHXT2_fpkm | MoHXT3_fpkm |
|-----------|----------|-------------|-------------|
| MGG_00005 | 5.11     | 81.85       | 78.07       |
| MGG_00015 | 2.42     | 4.76        | 9.17        |
| MGG_00016 | 10.10    | 12.72       | 19.99       |
| MGG_00017 | 0.89     | 1.13        | 5.83        |
| MGG_00018 | 59.61    | 94.08       | 539.23      |
| MGG_00019 | 128.04   | 78.70       | 1743.63     |
| MGG_00020 | 27.24    | 25.43       | 583.84      |
| MGG_00022 | 0.03     | 1.91        | 3.92        |
| MoHXT3    | 306.28   | 533.04      | 11.99       |
| MGG_00032 | 9.79     | 13.18       | 14.66       |
| MGG_00033 | 102.63   | 159.39      | 201.01      |
| MGG_00039 | 6.90     | 21.56       | 11.39       |
| MoHXT2    | 11.35    | 1.13        | 7.22        |
| MGG_00049 | 21.67    | 17.42       | 25.5        |
| MGG_00050 | 17.37    | 8.69        | 17.21       |
| MGG_00052 | 55.70    | 220.95      | 87.82       |
| MGG_00068 | 278.76   | 187.82      | 183.03      |



**Table S3. Plasmids used in this study.**

| Strains/Plasmids       | Description                                                              | Sources                                      |
|------------------------|--------------------------------------------------------------------------|----------------------------------------------|
| Strains                |                                                                          |                                              |
| <i>M. oryzae</i> A60   | The wild-type strain                                                     | From Yunnan Academy of Agricultural Sciences |
| $\Delta Mohxt2$        | $\Delta Mohxt2$ , <i>MoHXT2</i> deletion mutant strain                   | This study                                   |
| $\Delta Mohxt3$        | $\Delta Mohxt3$ , <i>MoHXT3</i> deletion mutant strain                   | This study                                   |
| EBY.VW4000             | The <i>S. cerevisiae</i> strain is deficient in monosaccharide transport | From Northwest A&F University                |
| Plasmids               |                                                                          |                                              |
| PDR-195                | Heterologous expression vectors in <i>S. cerevisiae</i>                  | From Northwest A&F University                |
| PDR- <i>MoHXT2</i>     | Heterologous expression <i>MoHXT2</i> in <i>S. cerevisiae</i>            | This study                                   |
| PDR- <i>MoHXT3</i>     | Heterologous expression <i>MoHXT3</i> in <i>S. cerevisiae</i>            | This study                                   |
| RP27-eGFP              | Direct cloning vector                                                    | In lab                                       |
| RP27- <i>MoHXT2</i>    | Cloning vector carrying intact <i>MoHXT2</i> gene                        | This study                                   |
| RP27- <i>MoHXT3</i>    | Cloning vector carrying intact <i>MoHXT3</i> gene                        | This study                                   |
| pYF11-GFP              | Restored functionality vectors in <i>M. oryzae</i>                       | In lab                                       |
| pYF11:: <i>MoHXT2</i>  | Restored functionality <i>MoHXT2</i> in <i>M. oryzae</i>                 | This study                                   |
| pYF11:: <i>MoHXT3</i>  | Restored functionality <i>MoHXT3</i> in <i>M. oryzae</i>                 | This study                                   |
| pT7TSHA                | Heterologous expression vectors in <i>X. oocytes</i> .                   | In lab                                       |
| pT7TSHA- <i>MoHXT2</i> | Heterologous expression <i>MoHXT2</i> in <i>X. oocytes</i> .             | This study                                   |
| pT7TSHA- <i>MoHXT3</i> | Heterologous expression <i>MoHXT3</i> in <i>X. oocytes</i> .             | This study                                   |

**Table S4. Primers used in this study.**

| Primer name           | Primer sequences (5'– 3')                                  | Remark                                       |
|-----------------------|------------------------------------------------------------|----------------------------------------------|
| MoHXT3 flank 1F       | CCGCTGACATGGACGCCAGAAAG                                    | Construction of homology arm                 |
| MoHXT3 flank 1R       | TTGGGTAGTATTGGGATGAGAA                                     | Construction of homology arm                 |
| MoHXT3 flank 2F       | GATCGAGGGCGACGCCAGCGACCAC                                  | Construction of homology arm                 |
| MoHXT3 flank 2R       | GCATCAGATTGGCCGAGATATTAC                                   | Construction of homology arm                 |
| MoHXT3CDS F           | ATGAGGCCGGTGCCGCTGGC                                       | Amplify CDS region for complementation assay |
| MoHXT3CDS R           | TTAGACCCTGTTGGCCTGATCG                                     | Amplify CDS region for complementation assay |
| MoHXT3 sgRNA1 Forward | CCTCTAATACGACTCACTATAGGAGCTCCTTCCAGTATTTCAAGTTTAAGAGCTATGC | sgRNA construction                           |
| HXT2 flank 1F         | CCGCACTTTGTGGCTGCCCCTTGG                                   | Construction of homology arm                 |
| MoHXT2 flank 1R       | CATTGACCCTGATGGACCTGTAC                                    | Construction of homology arm                 |
| MoHXT2 flank 2F       | ACGCCAAGCAAAGGCCTGGTAGC                                    | Construction of homology arm                 |
| MoHXT2 flank 2R       | TCTCCTCCATCACGGGCAGCAAC                                    | Construction of homology arm                 |
| MoHXT2 CDSF           | ATGCTTGGCGGCAAGTAAGTT                                      | Amplify CDS region for complementation assay |
| MoHXT2 CDSR           | TTACGCGTTCCGGAGCACAGCC                                     | Amplify CDS region for complementation assay |
| Cleaved gRNA R        | ATGAAACCGACACCGAGACCAG                                     | Amplify for Cleaved gRNA                     |
| HPT(5'R)              | ATAAAGGGAGGAAGGGCGAAC                                      | Amplify HPH gene                             |
| HPT (3' F)            | GCGTTTCGGGTTTACCTCTTCC                                     | Amplify HPH gene                             |
| MoHXT1 flank 1F       | CCACTACCAGGCAAACAAAG                                       | Amplify for homology arm                     |

|                       |                                                            |                                              |
|-----------------------|------------------------------------------------------------|----------------------------------------------|
| MoHXT1 flank 1R       | AACAGGAGGGAAGGTGAGGC                                       | Amplify for homology arm                     |
| MoHXT1 flank 2F       | ATCGCCACCGAGTCTGCCAAGGAGG                                  | Amplify for homology arm                     |
| MoHXT1 flank 2R       | TCAATTTCGTCCGTCTGTACCTG                                    | Amplify for homology arm                     |
| MoHXT1CDS F           | ATGCCCCGGCTCCGTCATCGGG                                     | Amplify CDS region for complementation assay |
| MoHXT1CDS R           | TTAGACGGTCTCCTCCTTGGC                                      | Amplify CDS region for complementation assay |
| MoHXT1 sgRNA1 Forward | CCTCTAATACGACTCACTATAGGATACCACCAAAGGCGGCAAGTTTAAGAGCTA TGC | Amplify for SgRNA                            |
| pDR195 F-00040        | ACCCCAGCCTCGAGCATGCTTGGCGGCAAGTCCATCA                      | Yest expression vector                       |
| pDR195R-00040         | GAAGTCCAAAGCTGGATCTTACGCGTTCCGGAGCACAGCC                   | Yest expression vector                       |
| pDR195F-06203         | ACCCCAGCCTCGAGCATGGTTCGCGGATTCAAGGGC                       | Yest expression vector                       |
| pDR195R-06203         | GAAGTCCAAAGCTGGATCTTAGACCCTGTTGGCCTGATC                    | Yest expression vector                       |
| pT7-00040-F           | GATCTGATATCACTAGTGCCACCATGCTTGGCGGCAAGTCCATCA              | Oocyte expression vector                     |
| pT7-00040-R           | CGCGGCCGCCTCGAGGCATGCTTACGCGTTCCGGAGCACAGCC                | Oocyte expression vector                     |
| pT7-06203-F           | GATCTGATATCACTAGTGCCACCATGGTTCGCGGATTCAAGGGC               | Oocyte expression vector                     |
| pT7-06203-R           | CGCGGCCGCCTCGAGGCATGCTTAGACCCTGTTGGCCTGATC                 | Oocyte expression vector                     |
| DTB-Lys-F             | CCGCACGCGTGCCATGCAGGCCT                                    | Site-directed Mutagenesis                    |
| DTB-Lys-R             | ATGGCACGCGTGCGGAGCGGGAAGGT                                 | Site-directed Mutagenesis                    |
